# Supplementary material for: Profiling of Brevetoxin Metabolites Produced by Karenia brevis 165 Based on Liquid Chromatography-Mass Spectrometry
Source: MDPI journal article supplement (doi:10.3390/toxins13050354), 2021-05-14
Supplement: s1 [file s1]

## Supplementary Materials: Profiling of Brevetoxin Metabolites Produced by *Karenia brevis* 165 Based on Liquid Chromatography-Mass Spectrometry

Huihui Shen, Xiuxian Song, Yue Zhang, Peipei Zhang, Jing Li, Weijia Song and Zhiming Yu

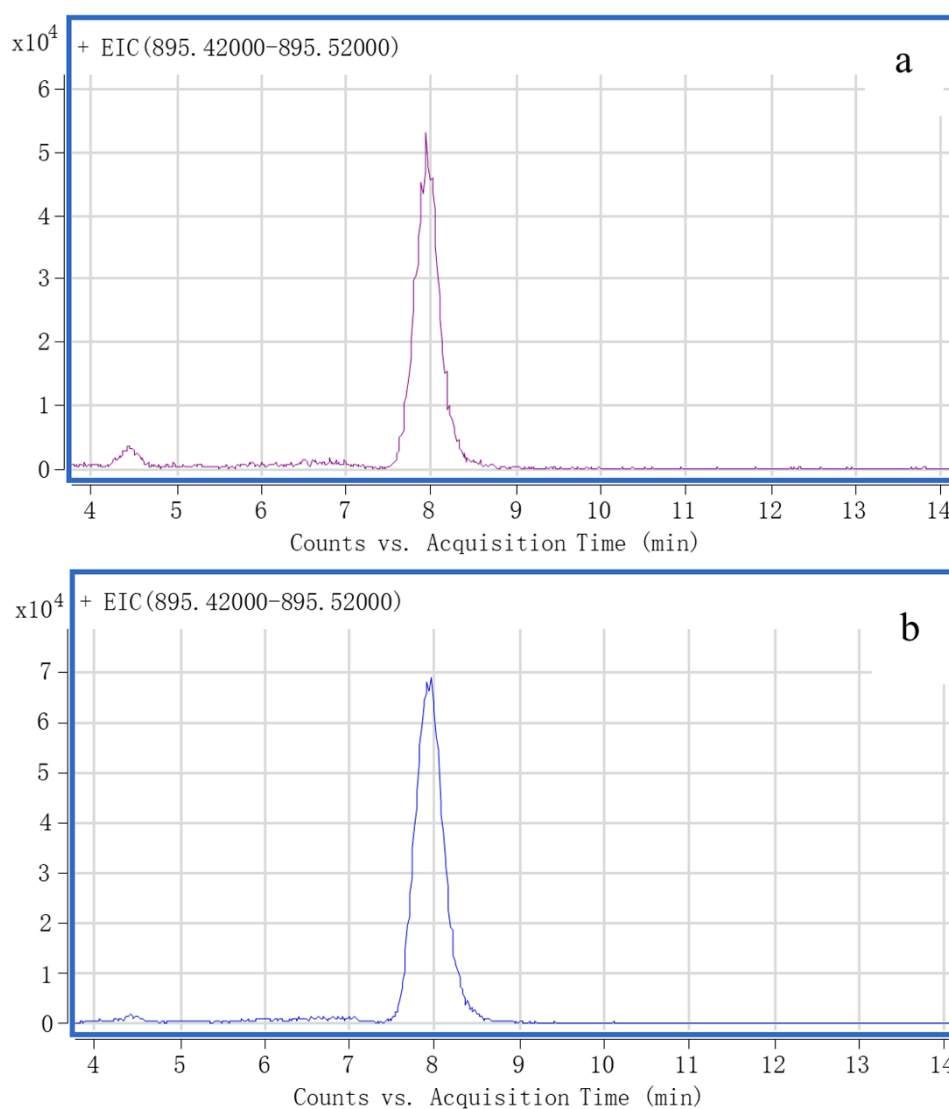

**Figure S1.** The LC-ToF-MS EICs of BTX2 with  $[M+H]^+$  ( $m/z$  895.42–895.52) in *K. brevis* 165 culture media treated by two methods. (a) C18 solid-phase extraction; (b) HLB solid-phase extraction.

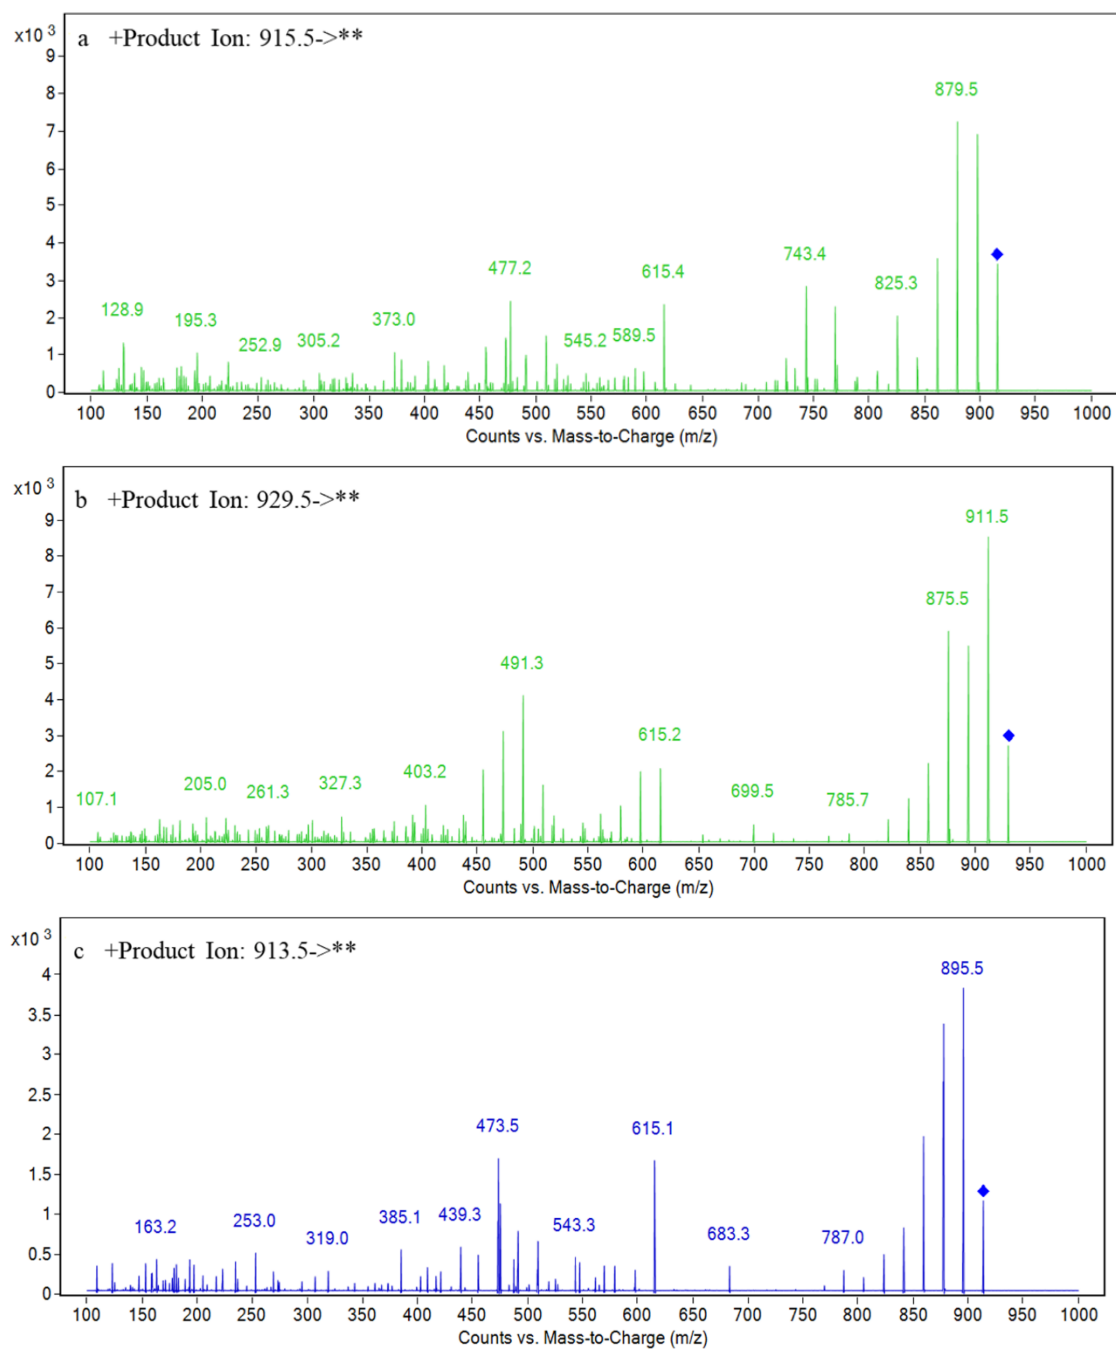

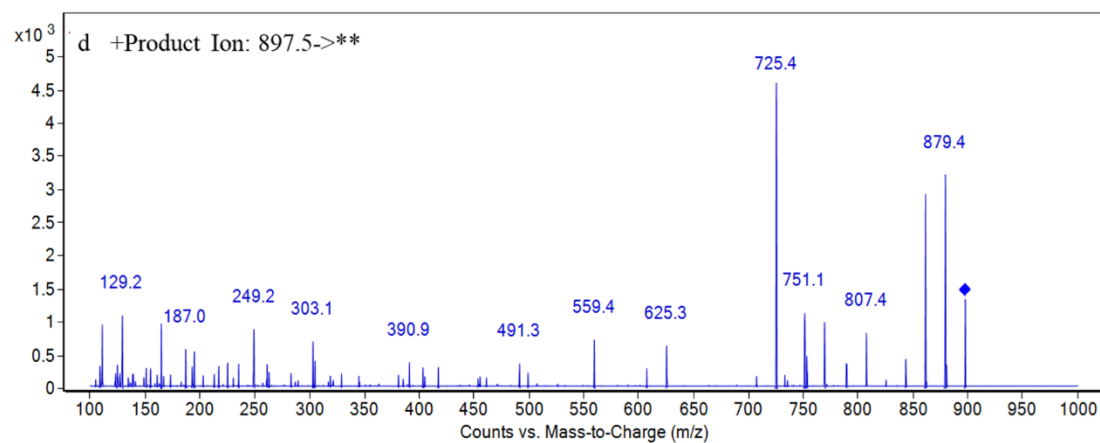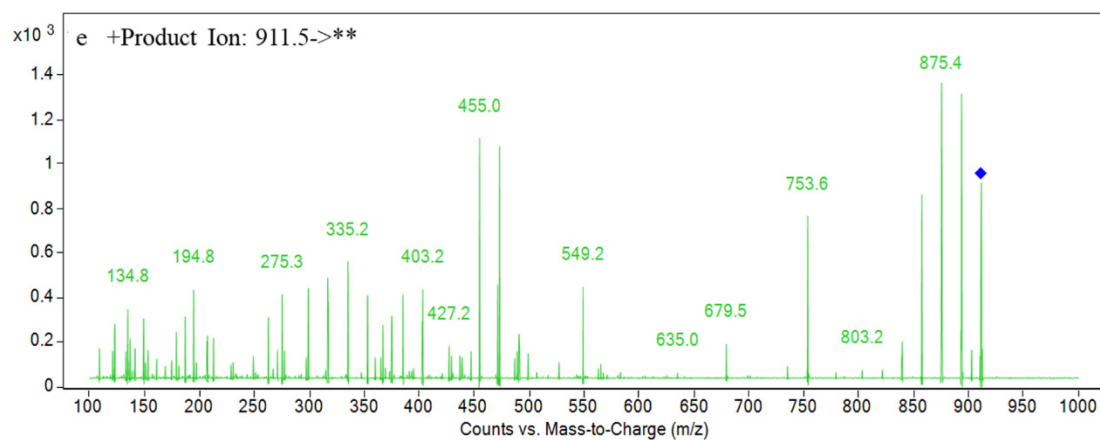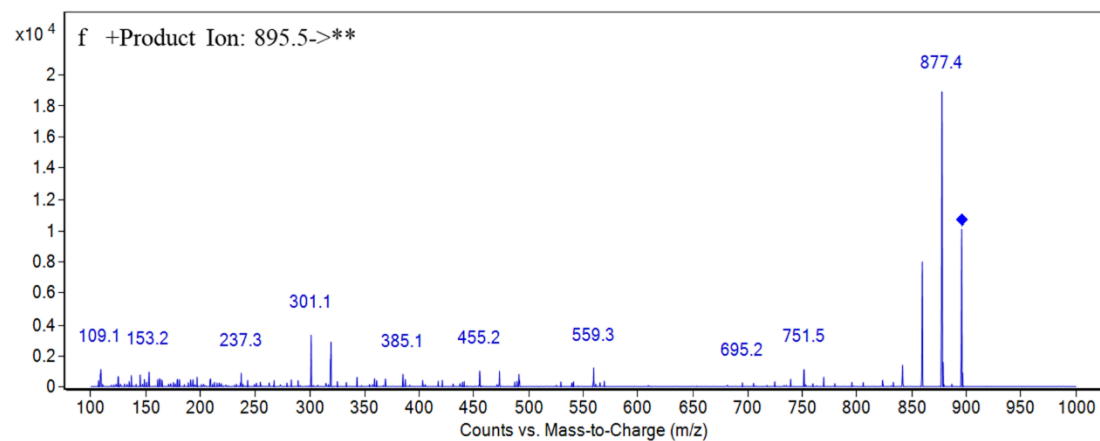

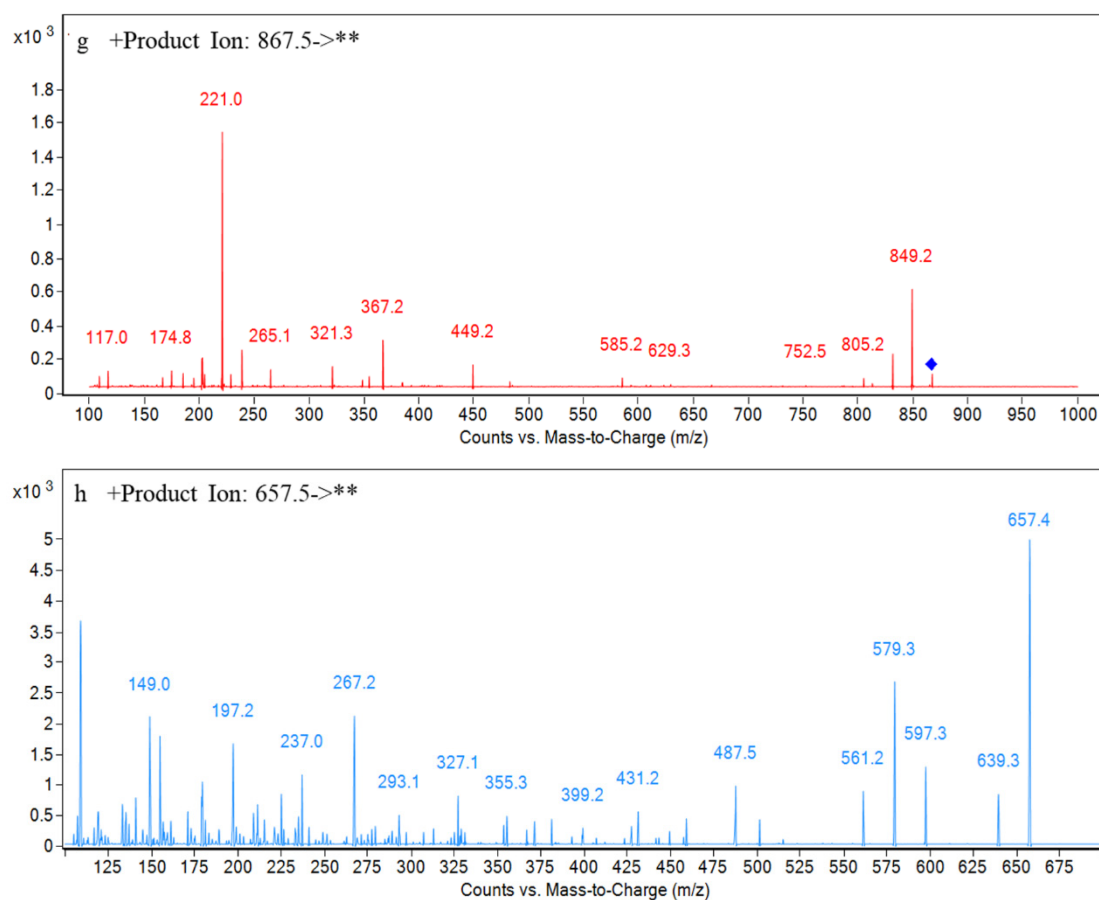

**Figure S2.** MS/MS spectra of BTX metabolites in *K. brevis* 165 algal cells and culture media with the LC-QqQ-MS/MS method. (a: OR-BTX3; b: OR-BTX-B5; c: OR-BTX2; d: BTX3; e: BTX-B5; f: BTX2; g: BTX1; h: Brevenal). \*\* denotes fragment ions of precursor  $[M+H]^+$  ion.

**Table S1.** The experimental results of the ToF-MS instrument precision.

| Toxins |                      | 1      | 2      | 3      | 4      | 5      | 6      | RSD (%) |
|--------|----------------------|--------|--------|--------|--------|--------|--------|---------|
| BTX1   | Area                 | 47811  | 46301  | 43619  | 39827  | 45921  | 48437  | 7.00    |
|        | Retention time (min) | 10.191 | 10.149 | 10.107 | 10.163 | 10.114 | 10.138 | 0.31    |
|        | Mass error (ppm)     | −3.12  | −3.31  | −3.46  | −3.02  | −3.59  | −3.05  | −       |
| BTX2   | Area                 | 21057  | 21952  | 23715  | 19974  | 22763  | 20163  | 6.85    |
|        | Retention time (min) | 7.994  | 7.962  | 8.003  | 7.907  | 7.929  | 7.969  | 0.47    |
|        | Mass error (ppm)     | −3.18  | −3.13  | −3.38  | −3.27  | −3.64  | −2.98  | −       |
| BTX3   | Area                 | 11756  | 13883  | 13064  | 11937  | 12734  | 12862  | 6.13    |
|        | Retention time (min) | 4.518  | 4.523  | 4.507  | 4.54   | 4.498  | 4.531  | 0.34    |
|        | Mass error (ppm)     | −3.22  | −3.31  | −3.74  | −3.28  | −3.43  | −3.09  | −       |

**Table S2.** The experimental results of the MS/MS instrument precision.

| Toxins |                      | 1     | 2     | 3     | 4     | 5     | 6     | RSD (%) |
|--------|----------------------|-------|-------|-------|-------|-------|-------|---------|
| BTX1   | Area                 | 12533 | 12203 | 12050 | 11964 | 12221 | 12995 | 3.09    |
|        | Retention time (min) | 9.341 | 9.319 | 9.315 | 9.302 | 9.306 | 9.336 | 0.17    |
| BTX2   | Area                 | 37781 | 37919 | 37118 | 37486 | 36364 | 39050 | 2.38    |
|        | Retention time (min) | 7.937 | 7.911 | 7.898 | 7.885 | 7.894 | 7.928 | 0.26    |
| BTX3   | Area                 | 14483 | 14564 | 13836 | 13847 | 13985 | 14714 | 2.76    |
|        | Retention time (min) | 4.978 | 4.957 | 4.939 | 4.931 | 4.939 | 4.978 | 0.42    |

**Table 3.** The inspection results of detecting BTXs in *K. brevis* 165 cells by LC-QqQ-MS/MS.

| BTXs | Linear range (pg) | Calibration curve      | Correlation coefficients (R <sup>2</sup> ) | LOD (pg) | LOQ (pg) | ME (%) |
|------|-------------------|------------------------|--------------------------------------------|----------|----------|--------|
| BTX1 | 75–5000           | $y = 2.618x - 55.727$  | 0.9999                                     | 30       | 75       | +9.32  |
| BTX2 | 50–5000           | $y = 7.9439x + 4.4827$ | 0.9999                                     | 25       | 50       | +5.71  |
| BTX3 | 50–5000           | $y = 4.2403x - 15.772$ | 0.9998                                     | 25       | 50       | +6.04  |

**Table S3-2.** The inspection results of detecting BTXs in *K. brevis* 165 culture media by LC-QqQ-MS/MS.

| BTXs | Linear range (pg) | Calibration curve      | Correlation coefficients (R <sup>2</sup> ) | LOD (pg) | LOQ (pg) | ME (%) |
|------|-------------------|------------------------|--------------------------------------------|----------|----------|--------|
| BTX1 | 100–5000          | $y = 38.686x - 627.39$ | 0.9999                                     | 50       | 100      | +11.62 |
| BTX2 | 75–5000           | $y = 87.76x - 6917$    | 0.9992                                     | 50       | 75       | +9.83  |
| BTX3 | 75–5000           | $y = 72.595x - 7007.5$ | 0.9996                                     | 50       | 75       | +10.15 |

**Table S4.** Formula and theoretical precise molecular mass of 34 BTX metabolites.

| BTX metabolites           | Formula                                              | Molecular weights | [M+H] <sup>+</sup> | [M+NH <sub>4</sub> ] <sup>+</sup> | [M+Na] <sup>+</sup> | [M+K] <sup>+</sup> | [M-H] <sup>-</sup> |
|---------------------------|------------------------------------------------------|-------------------|--------------------|-----------------------------------|---------------------|--------------------|--------------------|
| PbTX-1                    | C <sub>49</sub> H <sub>70</sub> O <sub>13</sub>      | 866.4816          | 867.4889           | 884.5155                          | 889.4709            | 905.4448           | 865.4744           |
| PbTX-2                    | C <sub>50</sub> H <sub>70</sub> O <sub>14</sub>      | 894.4766          | 895.4838           | 912.5104                          | 917.4658            | 933.4397           | 893.4693           |
| PbTX-3                    | C <sub>50</sub> H <sub>72</sub> O <sub>14</sub>      | 896.4922          | 897.4995           | 914.5260                          | 919.4814            | 935.4554           | 895.4849           |
| PbTX-5                    | C <sub>52</sub> H <sub>74</sub> O <sub>15</sub>      | 938.5028          | 939.5101           | 956.5366                          | 961.4920            | 977.4659           | 937.4955           |
| PbTX-6                    | C <sub>52</sub> H <sub>72</sub> O <sub>16</sub>      | 952.4820          | 953.4893           | 970.5159                          | 975.4713            | 991.4452           | 951.4748           |
| PbTX-7                    | C <sub>49</sub> H <sub>71</sub> O <sub>13</sub>      | 867.4895          | 868.4967           | 885.5233                          | 890.4787            | 906.4526           | 866.4822           |
| PbTX-8                    | C <sub>49</sub> H <sub>69</sub> ClO <sub>14</sub>    | 916.4376          | 917.4450           | 934.4714                          | 939.4268            | 955.4007           | 915.4303           |
| PbTX-9                    | C <sub>50</sub> H <sub>74</sub> O <sub>14</sub>      | 898.5079          | 899.5151           | 916.5417                          | 921.4971            | 937.4710           | 897.5006           |
| PbTX-10                   | C <sub>49</sub> H <sub>74</sub> O <sub>13</sub>      | 870.5130          | 871.5202           | 888.5468                          | 893.5022            | 909.4761           | 869.5057           |
| PbTX-11                   | C <sub>52</sub> H <sub>72</sub> O <sub>14</sub>      | 920.4922          | 921.4995           | 938.5260                          | 943.4814            | 959.4554           | 919.4849           |
| PbTX-12                   | C <sub>55</sub> H <sub>70</sub> O <sub>14</sub>      | 954.4766          | 955.4838           | 972.5104                          | 977.4658            | 993.4397           | 953.4693           |
| PbTX-13                   | C <sub>55</sub> H <sub>78</sub> O <sub>16</sub>      | 994.5290          | 995.5363           | 1012.5628                         | 1017.5182           | 1033.4921          | 993.5217           |
| PbTX-14                   | C <sub>54</sub> H <sub>76</sub> O <sub>15</sub>      | 964.5179          | 965.5257           | 982.5523                          | 987.5076            | 1003.4816          | 963.5112           |
| PbTX-tbm                  | C <sub>46</sub> H <sub>66</sub> O <sub>13</sub>      | 826.4503          | 827.4576           | 844.4842                          | 849.4396            | 865.4135           | 825.4431           |
| Brevenal                  | C <sub>39</sub> H <sub>60</sub> O <sub>8</sub>       | 656.42882         | 657.4361           | 674.46264                         | 679.4180            | 695.3920           | 655.4215           |
| brevenal acetal           | C <sub>41</sub> H <sub>66</sub> O <sub>9</sub>       | 702.4707          | 703.4780           | 720.5045                          | 725.4599            | 741.4338           | 701.4634           |
| Open-ring PbTx-1          | C <sub>49</sub> H <sub>72</sub> O <sub>14</sub>      | 884.4922          | 885.4995           | 902.5260                          | 907.4814            | 923.4554           | 883.4849           |
| Oxidized PbTx-1           | C <sub>49</sub> H <sub>70</sub> O <sub>14</sub>      | 882.4766          | 883.4838           | 900.5104                          | 905.4658            | 921.4397           | 881.4693           |
| Open-ring, ox. PbTx-1     | C <sub>49</sub> H <sub>72</sub> O <sub>15</sub>      | 900.4871          | 901.4944           | 918.5210                          | 923.4763            | 939.4503           | 899.4799           |
| Open-ring PbTx-7          | C <sub>49</sub> H <sub>73</sub> O <sub>14</sub>      | 885.5000          | 886.5073           | 903.5339                          | 908.4893            | 924.4632           | 884.4928           |
| Open-ring PbTx-2          | C <sub>50</sub> H <sub>72</sub> O <sub>15</sub>      | 912.4871          | 913.4944           | 930.5210                          | 935.4763            | 951.4503           | 911.4799           |
| BTX-B5                    | C <sub>50</sub> H <sub>70</sub> O <sub>15</sub>      | 910.4715          | 911.4788           | 928.5053                          | 933.4607            | 949.4346           | 909.4642           |
| Open-ring, BTX-B5         | C <sub>50</sub> H <sub>72</sub> O <sub>16</sub>      | 928.4820          | 929.4893           | 946.5159                          | 951.4713            | 967.4452           | 927.4748           |
| Open-ring PbTx-3          | C <sub>50</sub> H <sub>74</sub> O <sub>15</sub>      | 914.5028          | 915.5101           | 932.5366                          | 937.4920            | 953.4659           | 913.4955           |
| Open-ring cysteine-PbTx-A | C <sub>52</sub> H <sub>81</sub> NO <sub>16</sub> S   | 1007.5276         | 1008.5349          | 1025.5614                         | 1030.5168           | 1046.4908          | 1006.5203          |
| Open-ring cysteine-PbTx-B | C <sub>53</sub> H <sub>81</sub> NO <sub>17</sub> S   | 1035.5225         | 1036.5298          | 1053.5564                         | 1058.5117           | 1074.4857          | 1034.51524         |
| BTX-B1                    | C <sub>52</sub> H <sub>74</sub> NO <sub>17</sub> Sna | 1039.4575         | 1040.4648          | 1057.4913                         | 1062.4467           | 1078.4207          | 1038.4502          |
| BTX-B2                    | C <sub>53</sub> H <sub>80</sub> NO <sub>17</sub> S   | 1034.5147         | 1035.5220          | 1052.5485                         | 1057.5039           | 1073.4779          | 1033.5074          |
| BTX-B3                    | C <sub>64</sub> H <sub>96</sub> O <sub>17</sub>      | 1136.6648         | 1137.6720          | 1154.6986                         | 1159.6540           | 1175.6279          | 1135.6575          |
| N-acylated-BTXB2          | C <sub>69</sub> H <sub>110</sub> NO <sub>18</sub> S  | 1272.7444         | 1273.7516          | 1290.7782                         | 1295.7336           | 1311.7075          | 1271.7371          |

|                              |                                                     |           |           |           |           |           |           |
|------------------------------|-----------------------------------------------------|-----------|-----------|-----------|-----------|-----------|-----------|
| N-myristoyl-BTXB2            | C <sub>67</sub> H <sub>106</sub> NO <sub>18</sub> S | 1244.7131 | 1245.7203 | 1262.7469 | 1267.7023 | 1283.6762 | 1243.7058 |
| cysteine-PbTx                | C <sub>53</sub> H <sub>80</sub> NO <sub>16</sub> S  | 1018.5198 | 1019.5271 | 1036.5536 | 1041.5090 | 1057.4829 | 1017.5125 |
| cysteine-PbTx sulfoxide      | C <sub>53</sub> H <sub>80</sub> NO <sub>17</sub> S  | 1034.5147 | 1035.5220 | 1052.5485 | 1057.5039 | 1073.4779 | 1033.5074 |
| taurine metabolite of PbTx-2 | C <sub>52</sub> H <sub>76</sub> NO <sub>17</sub> S  | 1018.4834 | 1019.4907 | 1036.5172 | 1041.4726 | 1057.4466 | 1017.4761 |

**Table S5.** The changes in concentrations of BTX metabolites produced by *K. brevis* 165 at different times throughout growth.

| Incubation Time (day)                            |                             | 7                     | 14                    | 21                    | 30                    |
|--------------------------------------------------|-----------------------------|-----------------------|-----------------------|-----------------------|-----------------------|
| Algae density ( $\times 10^3$ cells/mL)          |                             | 9.89                  | 17.45                 | 15.04                 | 4.37                  |
| BTX2 (pg/cell)                                   | Intracellular               | 3.52                  | 15.60                 | 12.39                 | 6.52                  |
|                                                  | Extracellular               | $1.82 \times 10^{-2}$ | $3.37 \times 10^{-2}$ | 2.90                  | 7.47                  |
|                                                  | Total                       | 3.54                  | 15.64                 | 15.29                 | 13.98                 |
|                                                  | Intracellular/Extracellular | 193.74                | 462.87                | 4.27                  | 0.87                  |
| Extracellular concentrations ( $\mu\text{g/L}$ ) |                             | 0.18                  | 0.43                  | 47.70                 | 32.62                 |
| BTX3 (pg/cell)                                   | Intracellular               | 1.73                  | 4.78                  | 1.53                  | 0.16                  |
|                                                  | Extracellular               | $0.47 \times 10^{-2}$ | $3.29 \times 10^{-2}$ | 1.58                  | 10.73                 |
|                                                  | Total                       | 1.74                  | 4.81                  | 3.11                  | 10.89                 |
|                                                  | Intracellular/Extracellular | 365.98                | 145.20                | 0.97                  | $1.53 \times 10^{-2}$ |
| Extracellular concentrations ( $\mu\text{g/L}$ ) |                             | $4.68 \times 10^{-2}$ | 0.42                  | 25.98                 | 46.88                 |
| BTX1 (pg/cell)                                   | Intracellular               | 0.90                  | 0.71                  | 0.45                  | 0.16                  |
|                                                  | Extracellular               | -                     | -                     | -                     | 1.66                  |
|                                                  | Total                       | 0.90                  | 0.71                  | 0.45                  | 1.82                  |
|                                                  | Intracellular/Extracellular | -                     | -                     | -                     | $9.7 \times 10^{-2}$  |
| Extracellular concentrations ( $\mu\text{g/L}$ ) |                             | $4.68 \times 10^{-2}$ | 0.42                  | 25.98                 | 46.88                 |
| BTX-B5 (pg/cell)                                 | Intracellular               | 0.63                  | 0.44                  | 0.53                  | 2.50                  |
|                                                  | Extracellular               | 0.81                  | 0.75                  | 8.58                  | 25.12                 |
|                                                  | Total                       | 1.44                  | 1.18                  | 9.11                  | 27.63                 |
|                                                  | Intracellular/Extracellular | 0.77                  | 0.59                  | $6.22 \times 10^{-2}$ | 0.10                  |
| Extracellular concentrations ( $\mu\text{g/L}$ ) |                             | 8.05                  | 9.49                  | 141.07                | 109.79                |
| Brevenal (pg/cell)                               | Intracellular               | 0.42                  | 0.28                  | 0.18                  | 0.62                  |
|                                                  | Extracellular               | $2.35 \times 10^{-2}$ | $3.07 \times 10^{-2}$ | $5.53 \times 10^{-2}$ | 0.24                  |
|                                                  | Total                       | 0.44                  | 0.31                  | 0.23                  | 0.86                  |
|                                                  | Intracellular/Extracellular | 17.79                 | 8.97                  | 3.22                  | 2.58                  |
| Extracellular concentrations ( $\mu\text{g/L}$ ) |                             | 0.23                  | 0.39                  | 0.91                  | 1.05                  |
| OR-BTX2 (pg/cell)                                | Extracellular               | $6.92 \times 10^{-2}$ | $7.83 \times 10^{-2}$ | $3.80 \times 10^{-2}$ | 1.84                  |
|                                                  | Total                       | $6.92 \times 10^{-2}$ | $7.83 \times 10^{-2}$ | $3.80 \times 10^{-2}$ | 1.84                  |
| Extracellular concentrations ( $\mu\text{g/L}$ ) |                             | $6.85 \times 10^{-2}$ | $9.97 \times 10^{-2}$ | $6.25 \times 10^{-2}$ | 8.06                  |
| OR-BTX-B5 (pg/cell)                              | Extracellular               | $1.11 \times 10^{-2}$ | $2.13 \times 10^{-2}$ | 0.78                  | 48.87                 |
|                                                  | Total                       | $1.11 \times 10^{-2}$ | $2.13 \times 10^{-2}$ | 0.78                  | 48.87                 |
| Extracellular concentrations ( $\mu\text{g/L}$ ) |                             | 0.11                  | 0.27                  | 12.80                 | 213.55                |
| OR-BTX3 (pg/cell)                                | Extracellular               | 0.12                  | 0.15                  | 0.20                  | 7.08                  |
|                                                  | Total                       | 0.12                  | 0.15                  | 0.20                  | 7.08                  |

|                                               |       |        |        |        |
|-----------------------------------------------|-------|--------|--------|--------|
| Extracellular concentrations (µg/L)           | 1.20  | 1.85   | 3.26   | 30.95  |
| Intracellular total concentrations (pg/cell)  | 6.78  | 21.53  | 14.91  | 9.35   |
| Extracellular total concentrations (µg/L)     | 10.27 | 13.46  | 231.44 | 449.11 |
| Total concentrations in single cell (pg/cell) | 7.82  | 22.58  | 28.98  | 112.12 |
| Total concentrations (ng/ml)                  | 77.34 | 394.02 | 435.86 | 489.96 |

**Table S6.** The proportion of intracellular BTX metabolites produced by *K. brevis* 165 at different times throughout growth.

|        | 7 day  | 14 day | 21 day | 30 day |
|--------|--------|--------|--------|--------|
| BTX2   | 51.95% | 72.49% | 83.13% | 69.74% |
| BTX3   | 25.51% | 22.18% | 10.25% | 1.75%  |
| BTX-B5 | 9.26%  | 2.03%  | 3.58%  | 26.78% |
| BTX1   | 13.27% | 3.30%  | 3.04%  | 1.72%  |

**Table S7.** Parameters of MS/MS in PRO mode for OA and DTX1 toxins.

| Compound | Molecular formula                               | Retention time (min) | Precursor ions (m/z)     | Qualitative and quantitative ions (m/z) | Fragmentor |
|----------|-------------------------------------------------|----------------------|--------------------------|-----------------------------------------|------------|
| BTX1     | C <sub>49</sub> H <sub>70</sub> O <sub>13</sub> | 10.2                 | [M+H] <sup>+</sup> 867.5 | 849.7 / 221.0                           | 180        |
| BTX2     | C <sub>50</sub> H <sub>70</sub> O <sub>14</sub> | 8.0                  | [M+H] <sup>+</sup> 895.5 | 877.5 / 859.5                           | 180        |
| BTX3     | C <sub>50</sub> H <sub>72</sub> O <sub>14</sub> | 4.5                  | [M+H] <sup>+</sup> 897.5 | 879.5 / 725.5                           | 180        |

### 1. Evaluation of Matrix Effect (ME)

The Fujian strain of *Karenia mikimotoi* (*K. mikimotoi*) cultured in the laboratory belongs to *Karenia* spp., and we have proved that the algae do not produce BTX metabolites. So, *K. mikimotoi* cells and culture media treated by methanol and solid-phase extraction, respectively, and the two kinds of extracts were selected as the blank control to evaluate matrix effect of determining BTX metabolites produce by *K. brevis* 165. A mixed standard of BTX1, BTX2 and BTX3 was diluted to the same concentration with methanol and *K. mikimotoi* extracts. Then, the BTX1, BTX2 and BTX3 in three standard solutions were analyzed under the same LC-QqQ-MS/MS conditions. The *ME* was calculated according to the following formula:

$$ME (\%) = \frac{(Ax - As)}{As} \times 100 \quad (1)$$

In the formula, *Ax* represents the peak areas of the BTXs in the blank algae culture and blank algae cells and *As* represents the peak areas of the BTXs in methanol. *ME* below 0% indicates signal suppression, while that above 0% reveals signal enhancement [1, 2].

### 2. Analyzing Data of Quantitatively Detecting BTX Metabolites

The mixed standard solution of BTX1, BTX2 and BTX3 was diluted with *K. mikimotoi* extracts at different multiples, and the BTX metabolites were detected under the optimum LC-QqQ-MS/MS conditions. Then, BTX metabolites concentration in the *K. brevis* 165 cells and culture media was analyzed based on the method of Shen et al. [1].

### 3. Recovery Rates

The mixed standard solution of BTX1, BTX2 and BTX3 was diluted with *K. mikimotoi* culture



media to three concentration including 1 µg/L, 10 µg/L and 100 µg/L. Then, the culture media added standards was treated by solid phase extraction (SPE). Each concentration was analyzed in three parallel tests. The concentration of BTX1, BTX2 and BTX3 were detected by LC-QqQ-MS/MS to calculate the recovery rate of the SPE method.

## References

1. Shen, H.H.; Chen, J.H.; Xu, X.L.; Pan, L.; Wang, X.R. Development of a High Performance Liquid Chromatography-Tandem Mass Spectrometry Method for Determination of Lipophilic Toxins in Marine Shellfishes and Edible Safety Evaluation. *Chin. J. Anal. Chem.* **2018**, *46*, 985–992; doi:10.1016/S1872-2040(18)61092-8.
2. Pan, L.; Chen, J.H.; Shen, H.H.; He, X.P.; Li, G.J.; Song, X.C.; Zhou, D.S.; Sun, C.J. Profiling of Extracellular Toxins Associated with Diarrhetic Shellfish Poison in *Prorocentrum lima* Culture Medium by High-Performance Liquid Chromatography Coupled with Mass Spectrometry. *Toxins* **2017**, *9*, 308:1–308:18; doi:10.3390/toxins9100308.
